# Supplementary material for: The influence of cancer on a forensic age estimation tool
Source: publisher site journal article supplement (doi:10.18632/aging.206281), 2025-07-17
Supplement: Supplementary file [file aging-v17-206281-supplementary-material-SD1.pdf]

## SUPPLEMENTARY FIGURES

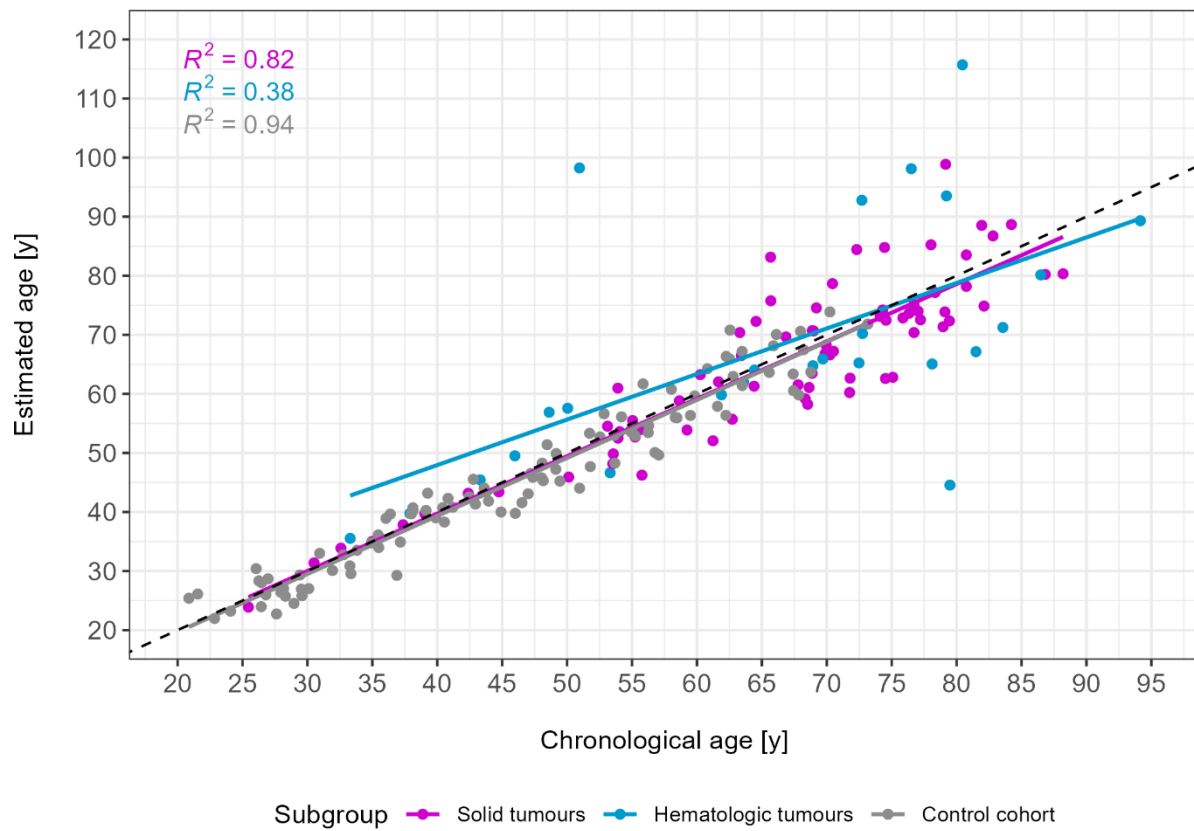

**Supplementary Figure 1. Age estimates of the study cohort (n = 202).** Solid tumours are depicted in magenta (n = 75), hematologic tumours in blue (n = 25) and the control cohort in grey (n = 102).  $R^2$  of each subgroup are depicted in the upper left corner. The grey dotted line is the line of identity. MAE in years: 4.98 (solid tumours), 11.14 (hematologic tumours), 2.72 (control cohort).

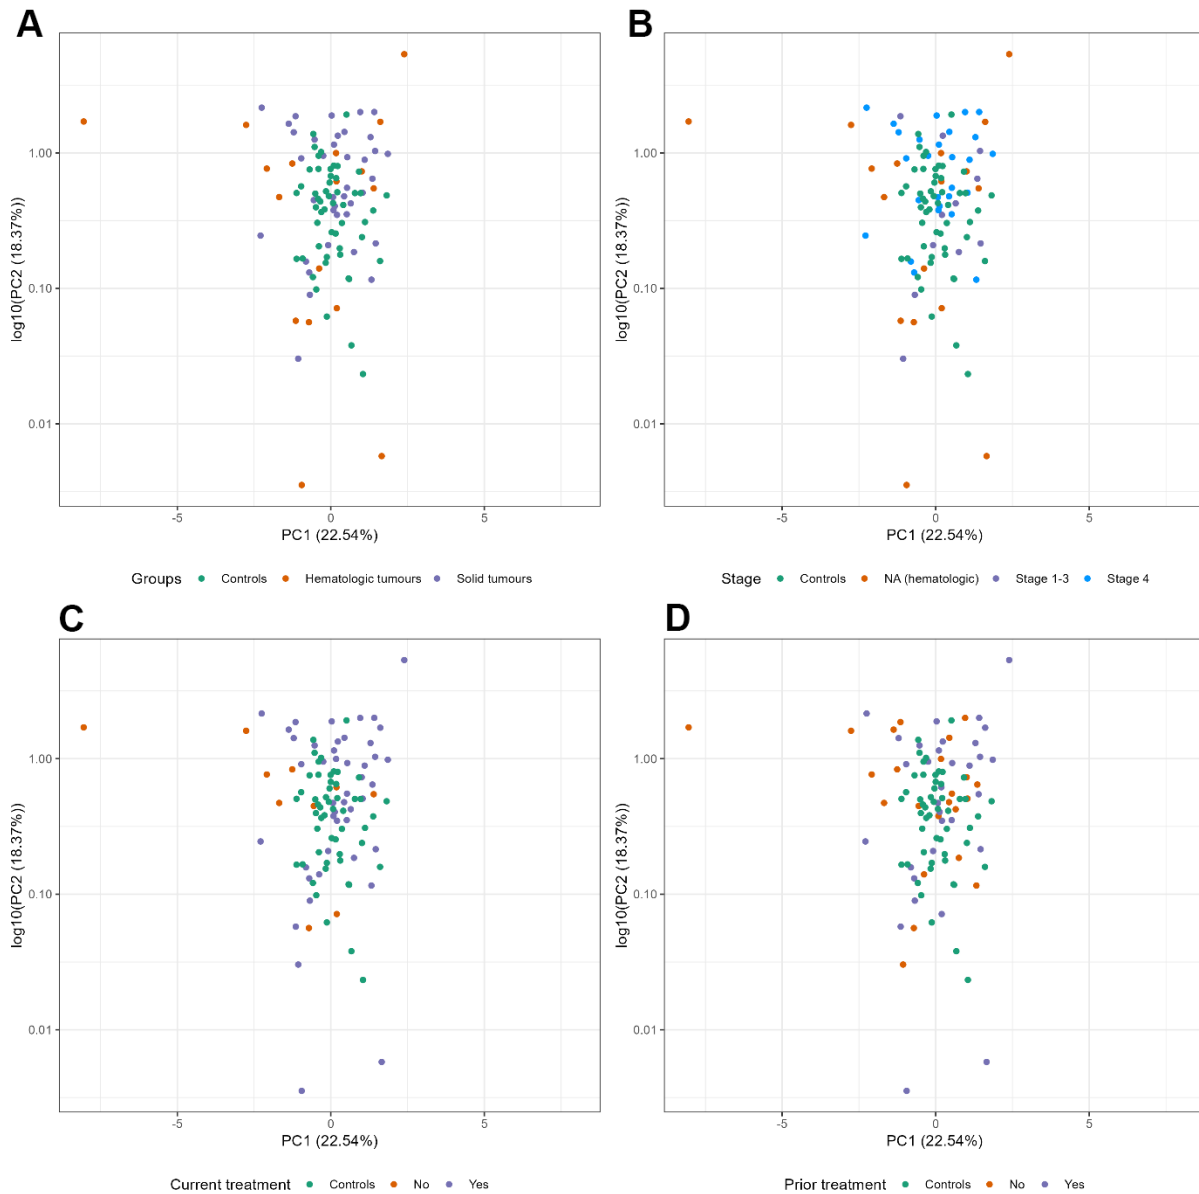

**Supplementary Figure 2. PCA plots on the six target CpG sites of all samples.** The beta values are normalized with linear regression to the respective chronological age of each individual. Each plot is colored according to a different meta data: grouping (**A**), stage (**B**), current treatment (**C**) and prior treatment (**D**). PC2 was log10 transformed for easier visual representation.

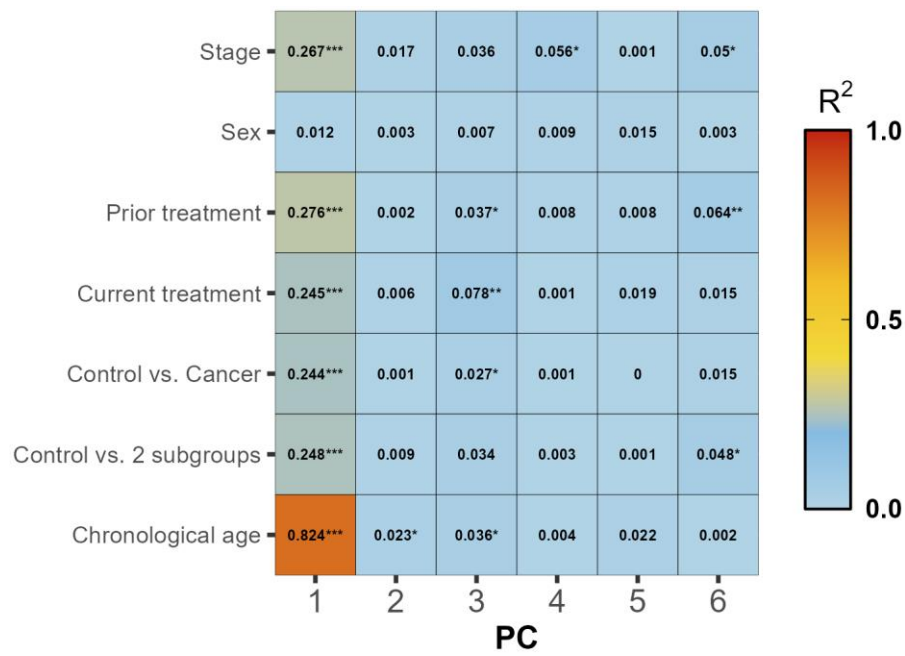

**Supplementary Figure 3. Variable association of methylation beta values of all 44 sequenced CpG sites with available meta data.** \* p-value  $\leq 0.05$ , \*\* p-value  $\leq 0.01$ , \*\*\* p-value  $\leq 0.001$ .

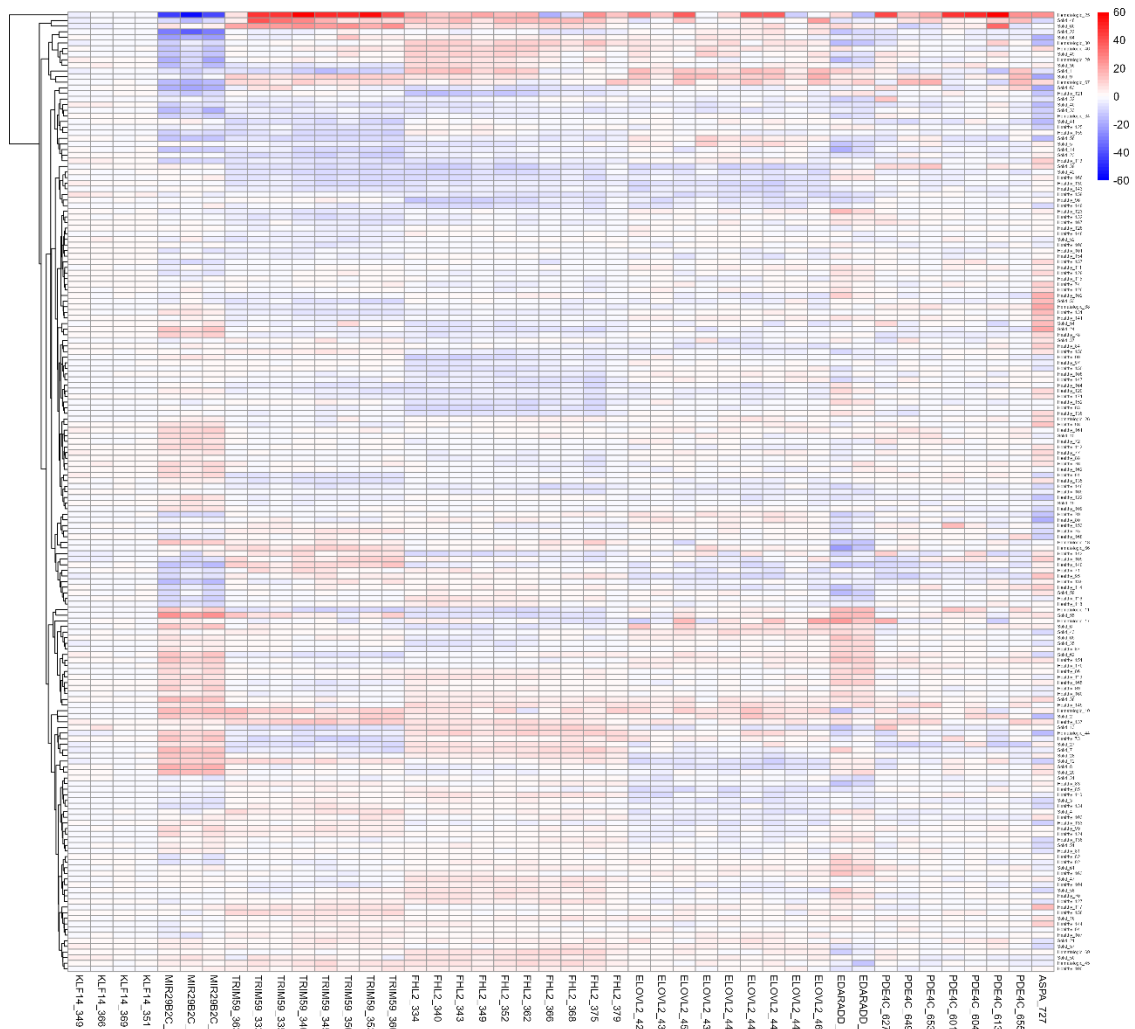

**Supplementary Figure 4. Heatmap of methylation beta values of all 44 sequenced CpG sites.** One sample clustered separately from all other samples (Cancer042).
